# Supplementary material for: Social Participation and Functional Decline: A Comparative Study of Rural and Urban Older People, Using Japan Gerontological Evaluation Study Longitudinal Data
Source: Int J Environ Res Public Health. 2020 Jan 18;17(2):617. doi: 10.3390/ijerph17020617 (PMC7013913; doi:10.3390/ijerph17020617)
Supplement: Supplementary file 1 [file ijerph-17-00617-s001.pdf]

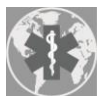

**Table S1.** Complete case analysis: HRs for participation in one, two, and three or more different types of organizations.

| <b>Rural</b> | <b>Crude model</b> | <b>Model 1</b>    | <b>Model 2</b>    |
|--------------|--------------------|-------------------|-------------------|
| n=5,673      | HR (95% CI)        | HR (95% CI)       | HR (95% CI)       |
| 0            | 1.00 Ref           | 1.00 Ref          | 1.00 Ref          |
| 1            | 0.58* (0.47–0.71)  | 0.81 (0.66–1.001) | 0.88 (0.72–1.09)  |
| 2            | 0.46* (0.37–0.58)  | 0.69* (0.55–0.87) | 0.77* (0.61–0.97) |
| ≥3           | 0.36* (0.30–0.43)  | 0.59* (0.48–0.72) | 0.72* (0.58–0.90) |
| Trend P      | p < 0.05           | p < 0.05          | p < 0.05          |
| <b>Urban</b> | <b>Crude model</b> | <b>Model 1</b>    | <b>Model 2</b>    |
| n=13,357     | HR (95% CI)        | HR (95% CI)       | HR (95% CI)       |
| 0            | 1.00 Ref           | 1.00 Ref          | 1.00 Ref          |
| 1            | 0.57* (0.50–0.66)  | 0.75* (0.65–0.86) | 0.81* (0.85–0.94) |
| 2            | 0.53* (0.46–0.62)  | 0.75* (0.65–0.87) | 0.86* (0.74–0.99) |
| ≥3           | 0.41* (0.36–0.47)  | 0.61* (0.53–0.70) | 0.77* (0.67–0.89) |
| Trend P      | p < 0.05           | p < 0.05          | p < 0.05          |

HR: Hazard ratio; CI: confidence interval; Ref: reference. \*p < 0.05.

Model 1: Crude model + sex, age, equivalent income, educational attainment, marital status, and self-reported medical conditions. Model 2: Model 1 + smoking, alcohol consumption, walking time (per. day), frequency of going outdoors, depression, emotional support, instrumental support, frequency of meeting friends, and IADL.

**Table S2.** The full modeling results for participation in one, two, and three or more different types of organizations in Model 2.

|                                                     | Rural               | Urban                |
|-----------------------------------------------------|---------------------|----------------------|
|                                                     | HR (95% CI)         | HR (95% CI)          |
| Number of types of organizations (ref. 0)           |                     |                      |
| 1                                                   | 0.94 (0.84–1.05)    | 0.92* (0.85–0.99)    |
| 2                                                   | 0.85* (0.75–0.97)   | 0.87* (0.80–0.96)    |
| ≥3                                                  | 0.76* (0.67–0.86)   | 0.82* (0.75–0.89)    |
| Missing                                             | 0.99 (0.82–1.20)    | 0.95 (0.82–1.10)     |
| Sex (ref. male)                                     |                     |                      |
| Female                                              | 1.14* (1.01–1.29)   | 1.02 (0.94–1.11)     |
| Age (ref. 65–69)                                    |                     |                      |
| 70–74                                               | 1.85* (1.57–2.19)   | 2.09* (1.87–2.34)    |
| 75–79                                               | 3.59* (3.07–4.21)   | 4.37* (3.92–4.87)    |
| 80–84                                               | 7.24* (6.16–8.50)   | 8.26* (7.38–9.24)    |
| 85+                                                 | 11.73* (9.83–14.00) | 12.70* (11.19–14.42) |
| Equivalent income (ref. low)                        |                     |                      |
| Middle                                              | 0.87* (0.78–0.97)   | 1.02 (0.95–1.09)     |
| High                                                | 1.04 (0.87–1.25)    | 0.89* (0.79–0.99)    |
| Missing                                             | 0.89* (0.80–0.98)   | 1.02 (0.94–1.10)     |
| Educational attainment (ref. < 10 years)            |                     |                      |
| 10–12                                               | 0.89* (0.80–0.98)   | 1.06 (0.95–1.09)     |
| ≥ 13                                                | 1.02 (0.88–1.17)    | 1.02 (0.79–0.99)     |
| Missing                                             | 1.16* (0.95–1.41)   | 1.12 (0.94–1.10)     |
| Marital status (ref. married)                       |                     |                      |
| Single                                              | 1.08 (0.98–1.19)    | 1.08* (1.01–1.16)    |
| Missing                                             | 1.11 (0.88–1.39)    | 1.12 (0.96–1.32)     |
| Self-reported medical conditions (ref. illness)     |                     |                      |
| No illness                                          | 0.76* (0.67–0.85)   | 0.75* (0.69–0.82)    |
| Missing                                             | 0.95 (0.83–1.09)    | 0.98 (0.89–1.07)     |
| Smoking (ref. never smoked)                         |                     |                      |
| Past smoker                                         | 1.20* (1.06–1.36)   | 1.03 (0.94–1.12)     |
| Current smoker                                      | 1.47* (1.25–1.73)   | 1.28* (1.15–1.43)    |
| Missing                                             | 1.01 (0.88–1.17)    | 1.00 (0.89–1.11)     |
| Alcohol consumption (ref. current drinker)          |                     |                      |
| Past drinker                                        | 1.28* (1.03–1.59)   | 1.25* (1.07–1.45)    |
| Never drank                                         | 0.98 (0.87–1.09)    | 1.11* (1.03–1.19)    |
| Missing                                             | 1.09 (0.87–1.36)    | 1.13* (0.95–1.35)    |
| Walking time (ref. <30 min/day)                     |                     |                      |
| 30–60                                               | 0.85* (0.77–0.94)   | 0.87* (0.81–0.93)    |
| 60–90                                               | 0.80* (0.70–0.92)   | 0.80* (0.73–0.88)    |
| >90                                                 | 0.73* (0.63–0.83)   | 0.73* (0.66–0.81)    |
| Missing                                             | 0.97 (0.82–1.14)    | 0.84* (0.74–0.96)    |
| Frequency of going outdoors (ref. almost every day) |                     |                      |
| 2–3 times/week                                      | 1.16* (1.05–1.29)   | 1.11* (1.03–1.18)    |
| About once/week                                     | 1.10 (0.96–1.26)    | 1.09 (0.99–1.22)     |
| Rarely                                              | 1.14* (0.99–1.31)   | 1.34* (1.19–1.49)    |
| Missing                                             | 1.11 (0.91–1.35)    | 1.18 (0.99–1.40)     |
| Depression (ref. no depression)                     |                     |                      |
| Depressive tendency                                 | 1.19* (1.07–1.33)   | 1.12* (1.16–1.34)    |
| Depression                                          | 1.41* (1.20–1.64)   | 1.35* (1.20–1.51)    |

|                                                      |                   |                   |
|------------------------------------------------------|-------------------|-------------------|
| Missing                                              | 1.06* (1.04–1.30) | 1.15* (1.07–1.25) |
| Emotional support (ref. available)                   |                   |                   |
| Not available                                        | 1.15* (1.02–1.30) | 1.12* (1.03–1.23) |
| Missing                                              | 0.95 (0.75–1.21)  | 0.93 (0.76–1.16)  |
| Instrumental support (ref. available)                |                   |                   |
| Not available                                        | 1.10 (0.99–1.23)  | 1.19* (1.10–1.28) |
| Missing                                              | 1.08 (0.84–1.37)  | 1.15 (0.93–1.42)  |
| Frequency of meeting friends (ref. almost every day) |                   |                   |
| 2–3 times/week                                       | 0.97 (0.84–1.11)  | 1.01 (0.91–1.12)  |
| About once/week                                      | 1.00 (0.85–1.16)  | 1.00 (0.89–1.11)  |
| 1–2 times/month                                      | 1.01 (0.87–1.18)  | 1.01 (0.90–1.12)  |
| A few times a year or less                           | 0.96 (0.83–1.12)  | 1.01 (0.91–1.13)  |
| Missing                                              | 1.04 (0.87–1.26)  | 1.05 (0.91–1.22)  |
| IADL (ref. not decline)                              |                   |                   |
| Decline                                              | 1.27* (1.44–1.40) | 1.21* (1.13–1.30) |
| Missing                                              | 1.41* (1.23–1.62) | 1.19* (1.07–1.32) |

HR: Hazard ratio; CI: confidence interval; Ref: reference. \*p < 0.05.

Model 1: Crude model + sex, age, equivalent income, educational attainment, marital status, and self-reported medical conditions. Model 2: Model 1 + smoking, alcohol consumption, walking time (per. day), frequency of going outdoors, depression, emotional support, instrumental support, frequency of meeting friends, and IADL.

**Table S3.** Complete case analysis: HRs for type of social participation (reference: nonparticipation in each organization).

| Rural           | Crude model       | Model 1           | Model 2           |
|-----------------|-------------------|-------------------|-------------------|
| n=5,673         | HR (95% CI)       | HR (95% CI)       | HR (95% CI)       |
| Local community | 0.58* (0.50–0.68) | 0.82* (0.70–0.96) | 0.89 (0.76–1.04)  |
| Hobby           | 0.51* (0.43–0.60) | 0.65* (0.55–0.77) | 0.71* (0.60–0.85) |
| Sports          | 0.52* (0.42–0.63) | 0.63* (0.51–0.78) | 0.70* (0.56–0.86) |
| Industry        | 0.59* (0.47–0.73) | 0.81 (0.64–1.02)  | 0.92 (0.73–1.16)  |
| Volunteer       | 0.63* (0.51–0.78) | 0.80* (0.65–0.99) | 0.93 (0.75–1.16)  |
| Citizen         | 1.26* (1.08–1.48) | 0.90 (0.77–1.06)  | 0.99 (0.84–1.17)  |
| Work            | 0.47* (0.38–0.57) | 0.75* (0.61–0.92) | 0.85 (0.68–1.05)  |
| Urban           | Crude model       | Model 1           | Model 2           |
| n=13,357        | HR (95% CI)       | HR (95% CI)       | HR (95% CI)       |
| Local community | 0.68* (0.61–0.75) | 0.82* (0.74–0.91) | 0.91 (0.82–1.02)  |
| Hobby           | 0.62* (0.56–0.69) | 0.75* (0.68–0.84) | 0.88* (0.79–0.99) |
| Sports          | 0.57* (0.50–0.64) | 0.74* (0.65–0.84) | 0.87* (0.75–0.99) |
| Industry        | 0.74* (0.64–0.85) | 0.89 (0.78–1.03)  | 1.03 (0.89–1.19)  |
| Volunteer       | 0.60* (0.52–0.70) | 0.76* (0.65–0.89) | 0.91 (0.78–1.07)  |
| Citizen         | 1.28* (1.14–1.44) | 0.86* (0.77–0.97) | 0.96 (0.85–1.09)  |
| Work            | 0.48* (0.42–0.55) | 0.78* (0.68–0.90) | 0.82* (0.71–0.95) |

HR: Hazard ratio; CI: confidence interval; Ref: reference. \*p < 0.05.

Model 1: Crude model + sex, age, equivalent income, educational attainment, marital status, and self-reported medical conditions. Model 2: Model 1 + smoking, alcohol consumption, walking time (per. day), frequency of going outdoors, depression, emotional support, instrumental support, frequency of meeting friends, and IADL.

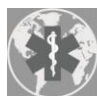

**Table S4.** The full modeling results for HRs for type of social participation (reference: nonparticipation in each organization).

| <b>Rural</b>                                             | <b>Local community</b> | <b>Hobby</b>        | <b>Sports</b>        | <b>Industry</b>     | <b>Volunteer</b>    | <b>Citizen</b>      | <b>Work</b>         |
|----------------------------------------------------------|------------------------|---------------------|----------------------|---------------------|---------------------|---------------------|---------------------|
|                                                          | HR (95% CI)            | HR (95% CI)         | HR (95% CI)          | HR (95% CI)         | HR (95% CI)         | HR (95% CI)         | HR (95% CI)         |
| Types of social participation<br>(ref. nonparticipation) |                        |                     |                      |                     |                     |                     |                     |
| Participation                                            | 0.86* (0.77–0.95)      | 0.76* (0.68–0.85)   | 0.79* (0.69–0.89)    | 1.01* (0.87–1.18)   | 0.89 (0.77–1.03)    | 1.02 (0.93–1.13)    | 0.80* (0.70–0.91)   |
| Missing                                                  | 1.00 (0.89–1.11)       | 0.96 (0.86–1.07)    | 0.98 (0.88–1.09)     | 1.04 (0.94–1.14)    | 1.07 (0.98–1.18)    | 1.08 (0.97–1.21)    | 0.97 (0.88–1.08)    |
| Sex (ref. male)                                          |                        |                     |                      |                     |                     |                     |                     |
| Female                                                   | 1.15* (1.02–1.30)      | 1.17* (1.04–1.32)   | 1.16* (1.03–1.31)    | 1.17* (1.03–1.32)   | 1.16* (1.03–1.31)   | 1.17* (1.03–1.32)   | 1.15* (1.01–1.30)   |
| Age (ref. 65–69)                                         |                        |                     |                      |                     |                     |                     |                     |
| 70–74                                                    | 1.85* (1.57–2.18)      | 1.87* (1.58–2.20)   | 1.87* (1.58–2.20)    | 1.85* (1.57–2.18)   | 1.84* (1.56–2.18)   | 1.84* (1.56–2.18)   | 1.81* (1.53–2.14)   |
| 75–79                                                    | 3.57* (3.05–4.19)      | 3.62* (3.09–4.24)   | 3.63* (3.10–4.26)    | 3.59* (3.06–4.21)   | 3.56* (3.04–4.18)   | 3.57* (3.04–4.20)   | 3.47* (2.95–4.07)   |
| 80–84                                                    | 7.20* (6.13–8.46)      | 7.27* (6.19–8.54)   | 7.33* (6.24–8.60)    | 7.26* (6.18–8.54)   | 7.19* (6.12–8.45)   | 7.24* (6.15–8.52)   | 6.99* (5.94–8.22)   |
| 85+                                                      | 11.65* (9.76–13.91)    | 11.86* (9.93–14.16) | 11.94* (10.00–14.25) | 11.89* (9.96–14.20) | 11.75* (9.84–14.03) | 11.83* (9.90–14.15) | 11.40* (9.53–13.63) |
| Equivalent income (ref. low)                             |                        |                     |                      |                     |                     |                     |                     |
| Middle                                                   | 0.87* (0.78–0.97)      | 0.87* (0.78–0.98)   | 0.87* (0.78–0.97)    | 0.87* (0.78–0.97)   | 0.87* (0.78–0.98)   | 0.87* (0.78–0.97)   | 0.87* (0.78–0.97)   |
| High                                                     | 1.02 (0.85–1.22)       | 1.04 (0.86–1.24)    | 1.03 (0.85–1.23)     | 1.03 (0.86–1.24)    | 1.03 (0.86–1.24)    | 1.03 (0.86–1.24)    | 1.05 (0.88–1.27)    |
| Missing                                                  | 0.89* (0.80–0.99)      | 0.89* (0.81–0.99)   | 0.90* (0.81–0.967)   | 0.90* (0.81–0.99)   | 0.89* (0.81–0.99)   | 0.90 (0.81–0.99)    | 0.90 (0.81–1.00)    |
| Educational attainment<br>(ref. < 10 years)              |                        |                     |                      |                     |                     |                     |                     |
| 10–12                                                    | 0.88* (0.79–0.97)      | 0.89* (0.81–0.99)   | 0.88* (0.79–0.97)    | 0.87* (0.79–0.97)   | 0.88* (0.79–0.97)   | 0.87* (0.79–0.97)   | 0.87* (0.79–0.96)   |
| ≥ 13                                                     | 1.01 (0.87–1.16)       | 1.03 (0.89–1.19)    | 1.01 (0.88–1.17)     | 1.00 (0.87–1.16)    | 1.01 (0.88–1.17)    | 1.00 (0.87–1.16)    | 0.99 (0.86–1.15)    |
| Missing                                                  | 1.15* (0.95–1.41)      | 1.16 (0.95–1.41)    | 1.15* (0.94–1.41)    | 1.15 (0.95–1.41)    | 1.16 (0.95–1.41)    | 1.16 (0.95–1.41)    | 1.16 (0.95–1.42)    |
| Marital status (ref. married)                            |                        |                     |                      |                     |                     |                     |                     |
| Single                                                   | 1.08 (0.98–1.20)       | 1.08 (0.98–1.19)    | 1.08 (0.98–1.19)     | 1.08 (0.98–1.19)    | 1.08 (0.98–1.20)    | 1.08 (0.98–1.20)    | 1.07 (0.97–1.18)    |
| Missing                                                  | 1.12 (0.89–1.40)       | 1.12 (0.89–1.40)    | 1.12 (0.89–1.40)     | 1.12 (0.89–1.40)    | 1.12 (0.89–1.41)    | 1.12 (0.89–1.40)    | 1.11 (0.88–1.39)    |
| Self-reported medical conditions<br>(ref. illness)       |                        |                     |                      |                     |                     |                     |                     |
| No illness                                               | 0.76* (0.67–0.85)      | 0.75* (0.67–0.85)   | 0.75* (0.67–0.85)    | 0.75* (0.67–0.85)   | 0.76* (0.67–0.85)   | 0.76* (0.67–0.85)   | 0.76* (0.68–0.85)   |
| Missing                                                  | 0.95 (0.83–1.08)       | 0.94 (0.83–1.08)    | 0.95 (0.83–1.09)     | 0.94 (0.83–1.08)    | 0.95 (0.83–1.08)    | 0.95 (0.83–1.08)    | 0.95 (0.83–1.09)    |
| Smoking (ref. never smoked)                              |                        |                     |                      |                     |                     |                     |                     |
| Past smoker                                              | 1.22* (1.07–1.38)      | 1.21* (1.07–1.37)   | 1.22* (1.07–1.38)    | 1.22* (1.07–1.38)   | 1.22* (1.07–1.38)   | 1.21* (1.07–1.38)   | 1.21* (1.06–1.37)   |
| Current smoker                                           | 1.49* (1.27–1.75)      | 1.48* (1.26–1.74)   | 1.48* (1.26–1.74)    | 1.49* (1.27–1.75)   | 1.49* (1.26–1.74)   | 1.49* (1.27–1.75)   | 1.49* (1.26–1.75)   |
| Missing                                                  | 1.01 (0.88–1.17)       | 1.02 (0.88–1.17)    | 1.02 (0.88–1.18)     | 1.02 (0.88–1.17)    | 1.01 (0.88–1.17)    | 1.02 (0.88–1.17)    | 1.02 (0.88–1.18)    |
| Alcohol consumption<br>(ref. current drinker)            |                        |                     |                      |                     |                     |                     |                     |
| Past drinker                                             | 1.29* (1.04–1.61)      | 1.29* (1.04–1.61)   | 1.29* (1.03–1.60)    | 1.30* (1.04–1.62)   | 1.30* (1.04–1.62)   | 1.30* (1.04–1.62)   | 1.29* (1.04–1.61)   |
| Never drank                                              | 0.99 (0.88–1.10)       | 0.98 (0.88–1.09)    | 0.98 (0.87–1.09)     | 0.99 (0.89–1.11)    | 0.99 (0.89–1.11)    | 0.99 (0.89–1.11)    | 0.99 (0.89–1.10)    |

|                                                          |                   |                   |                   |                    |                   |                    |                    |
|----------------------------------------------------------|-------------------|-------------------|-------------------|--------------------|-------------------|--------------------|--------------------|
| Missing                                                  | 1.09 (0.87–1.35)  | 1.08 (0.88–1.35)  | 1.07 (0.86–1.34)  | 1.09 (0.87–1.36)   | 1.09 (0.88–1.36)  | 1.09 (0.88–1.36)   | 1.08 (0.87–1.35)   |
| Walking time<br>(ref. <30 min/day)                       |                   |                   |                   |                    |                   |                    |                    |
| 30–60                                                    | 0.85* (0.77–0.94) | 0.85* (0.77–0.94) | 0.85* (0.77–0.94) | 0.85* (0.77–0.94)  | 0.85* (0.77–0.94) | 0.85* (0.77–0.94)  | 0.84* (0.76–0.93)  |
| 60–90                                                    | 0.80* (0.70–0.91) | 0.80* (0.70–0.92) | 0.80* (0.70–0.92) | 0.79* (0.69–0.91)  | 0.79* (0.69–0.91) | 0.79* (0.69–0.91)  | 0.79* (0.69–0.91)  |
| >90                                                      | 0.72* (0.62–0.82) | 0.72* (0.62–0.82) | 0.72* (0.62–0.83) | 0.71* (0.62–0.82)  | 0.71* (0.62–0.82) | 0.71* (0.62–0.82)  | 0.73* (0.64–0.84)  |
| Missing                                                  | 0.98 (0.83–1.16)  | 0.98 (0.83–1.16)  | 0.99 (0.83–1.17)  | 0.98 (0.83–1.16)   | 0.98 (0.83–1.15)  | 0.98 (0.83–1.16)   | 1.00 (0.84–1.18)   |
| Frequency of going outdoors<br>(ref. almost every day)   |                   |                   |                   |                    |                   |                    |                    |
| 2–3 times/week                                           | 1.17* (1.06–1.30) | 1.17* (1.05–1.30) | 1.17* (1.05–1.29) | 1.17* (1.06–1.30)  | 1.17* (1.05–1.30) | 1.17* (1.06–1.30)  | 1.16* (1.05–1.29)  |
| About once/week                                          | 1.12 (0.98–1.28)  | 1.11 (0.97–1.27)  | 1.11 (0.97–1.27)  | 1.13 (0.99–1.29)   | 1.12 (0.98–1.28)  | 1.13 (0.98–1.29)   | 1.13 (0.99–1.29)   |
| Rarely                                                   | 1.16* (1.01–1.33) | 1.14* (1.00–1.31) | 1.15* (1.01–1.33) | 1.17* (1.02–1.35)  | 1.17* (1.02–1.34) | 1.18* (1.02–1.35)  | 1.18* (1.02–1.35)  |
| Missing                                                  | 1.12 (0.92–1.37)  | 1.12 (0.92–1.37)  | 1.12 (0.92–1.37)  | 1.13 (0.93–1.38)   | 1.13 (0.93–1.37)  | 1.13 (0.93–1.38)   | 1.13 (0.93–1.38)   |
| Depression<br>(ref. no depression)                       |                   |                   |                   |                    |                   |                    |                    |
| Depressive tendency                                      | 1.20* (1.08–1.34) | 1.29* (1.07–1.32) | 1.20* (1.08–1.33) | 1.21* (1.08–1.35)  | 1.20* (1.08–1.34) | 1.21* (1.08–1.35)  | 1.20* (1.08–1.34)  |
| Depression                                               | 1.44* (1.23–1.68) | 1.42* (1.21–1.66) | 1.43* (1.22–1.67) | 1.45* (1.24–1.70)  | 1.44* (1.23–1.69) | 1.45* (1.24–1.69)  | 1.43* (1.23–1.68)  |
| Missing                                                  | 1.17* (1.04–1.31) | 1.17* (1.05–1.31) | 1.17* (1.05–1.31) | 1.18* (1.05–1.32)  | 1.17* (1.05–1.31) | 1.17* (1.05–1.31)  | 1.18* (1.05–1.32)  |
| Emotional support<br>(ref. available)                    |                   |                   |                   |                    |                   |                    |                    |
| Not available                                            | 1.15* (1.02–1.31) | 1.15* (1.02–1.31) | 1.15* (1.02–1.31) | 1.16* (1.02–1.31)  | 1.15* (1.02–1.30) | 1.16* (1.02–1.31)  | 1.16* (1.02–1.31)  |
| Missing                                                  | 0.96 (0.75–1.22)  | 0.95 (0.75–1.21)  | 0.96 (0.76–1.22)  | 0.96 (0.75–1.21)   | 0.95 (0.75–1.21)  | 0.96 (0.75–1.21)   | 0.96 (0.76–1.23)   |
| Instrumental support<br>(ref. available)                 |                   |                   |                   |                    |                   |                    |                    |
| Not available                                            | 1.11* (1.02–1.31) | 1.11 (1.00–1.24)  | 1.11 (1.00–1.24)  | 1.12* (1.002–1.25) | 1.12 (1.00–1.25)  | 1.12* (1.001–1.25) | 1.12* (1.005–1.25) |
| Missing                                                  | 1.09 (0.75–1.22)  | 1.09 (0.85–1.39)  | 1.09 (0.86–1.39)  | 1.09 (0.86–1.39)   | 1.08 (0.85–1.38)  | 1.09 (0.85–1.38)   | 1.09 (0.86–1.39)   |
| Frequency of meeting friends (ref.<br>almost every day)  |                   |                   |                   |                    |                   |                    |                    |
| 2–3 times/week                                           | 0.95 (0.82–1.09)  | 0.97 (0.84–1.12)  | 0.96 (0.83–1.11)  | 0.95 (0.82–1.09)   | 0.95 (0.82–1.10)  | 0.95 (0.82–1.09)   | 0.94 (0.81–1.08)   |
| About once/week                                          | 0.98 (0.84–1.15)  | 1.01 (0.86–1.18)  | 0.99 (0.85–1.15)  | 0.98 (0.84–1.15)   | 0.99 (0.85–1.16)  | 0.99 (0.84–1.15)   | 0.97 (0.83–1.14)   |
| 1–2 times/month                                          | 1.01 (0.87–1.17)  | 1.01 (0.87–1.18)  | 1.00 (0.86–1.16)  | 1.00 (0.87–1.17)   | 1.01 (0.87–1.17)  | 1.01 (0.87–1.17)   | 1.00 (0.86–1.15)   |
| A few times a year or less                               | 0.99 (0.85–1.15)  | 0.97 (0.83–1.12)  | 0.97 (0.84–1.13)  | 1.00 (0.86–1.16)   | 1.00 (0.86–1.16)  | 1.00 (0.86–1.17)   | 0.98 (0.85–1.14)   |
| Missing                                                  | 1.07 (0.88–1.29)  | 1.08 (0.89–1.30)  | 1.08 (0.89–1.30)  | 1.07 (0.89–1.30)   | 1.06 (0.88–1.28)  | 1.06 (0.88–1.28)   | 1.08 (0.90–1.30)   |
| IADL (ref. not decline)                                  |                   |                   |                   |                    |                   |                    |                    |
| Decline                                                  | 1.29* (1.17–1.43) | 1.27* (1.14–1.40) | 1.29* (1.17–1.43) | 1.31* (1.18–1.45)  | 1.30* (1.18–1.44) | 1.31* (1.18–1.45)  | 1.30* (1.18–1.44)  |
| Missing                                                  | 1.44* (1.25–1.66) | 1.41* (1.23–1.63) | 1.44* (1.25–1.66) | 1.46* (1.27–1.68)  | 1.45* (1.26–1.66) | 1.46* (1.27–1.68)  | 1.45* (1.26–1.67)  |
| Urban                                                    | Local community   | Hobby             | Sports            | Industry           | Volunteer         | Citizen            | Work               |
|                                                          | HR (95% CI)       | HR (95% CI)       | HR (95% CI)       | HR (95% CI)        | HR (95% CI)       | HR (95% CI)        | HR (95% CI)        |
| Types of social participation<br>(ref. nonparticipation) |                   |                   |                   |                    |                   |                    |                    |

|                                                    |                      |                      |                      |                      |                      |                      |                      |
|----------------------------------------------------|----------------------|----------------------|----------------------|----------------------|----------------------|----------------------|----------------------|
| Participation                                      | 0.95 (0.88–1.01)     | 0.90* (0.84–0.97)    | 0.83* (0.77–0.91)    | 1.04 (0.95–1.15)     | 0.94 (0.85–1.04)     | 0.99 (0.92–1.07)     | 0.83* (0.76–0.91)    |
| Missing                                            | 1.00 (0.93–1.07)     | 0.99 (0.92–1.08)     | 0.95 (0.88–1.03)     | 1.04 (0.97–1.12)     | 1.03 (0.97–1.11)     | 1.05 (0.97–1.13)     | 0.98 (0.90–1.06)     |
| Sex (ref. male)                                    |                      |                      |                      |                      |                      |                      |                      |
| Female                                             | 1.03 (0.94–1.12)     | 1.03 (0.95–1.13)     | 1.04 (0.95–1.13)     | 1.04 (0.95–1.13)     | 1.03 (0.95–1.12)     | 1.03 (0.95–1.13)     | 1.02 (0.94–1.11)     |
| Age (ref. 65–69)                                   |                      |                      |                      |                      |                      |                      |                      |
| 70–74                                              | 2.10* (1.87–2.35)    | 2.10* (1.88–2.35)    | 2.10* (1.87–2.35)    | 2.09* (1.87–2.34)    | 2.09* (1.87–2.34)    | 2.10* (1.87–2.35)    | 2.06* (1.84–2.31)    |
| 75–79                                              | 4.38* (3.93–4.88)    | 4.40* (3.95–4.90)    | 4.40* (3.95–4.90)    | 4.38* (3.92–4.87)    | 4.37* (3.92–4.87)    | 4.38* (3.93–4.89)    | 4.26* (3.82–4.75)    |
| 80–84                                              | 8.33* (7.45–9.32)    | 8.35* (7.47–9.34)    | 8.32* (7.44–9.31)    | 8.33* (7.44–9.32)    | 8.31* (7.42–9.29)    | 8.35* (7.46–9.35)    | 8.07* (7.20–9.04)    |
| 85+                                                | 12.82* (11.30–14.56) | 12.84* (11.32–14.58) | 12.81* (11.39–14.54) | 12.85* (11.32–14.59) | 12.81* (11.28–14.54) | 12.91* (11.37–14.67) | 12.45* (10.96–14.15) |
| Equivalent income (ref. low)                       |                      |                      |                      |                      |                      |                      |                      |
| Middle                                             | 1.01 (0.94–1.08)     | 1.01 (0.94–1.09)     | 1.01 (0.94–1.09)     | 1.01 (0.94–1.08)     | 1.01 (0.94–1.08)     | 1.01 (0.94–1.08)     | 1.01 (0.94–1.08)     |
| High                                               | 0.87* (0.78–0.97)    | 0.88* (0.79–0.98)    | 0.88* (0.79–0.98)    | 0.87* (0.78–0.97)    | 0.88* (0.79–0.98)    | 0.88* (0.79–0.97)    | 0.90* (0.80–0.998)   |
| Missing                                            | 1.02 (0.94–1.10)     | 1.02 (0.94–1.10)     | 1.02 (0.94–1.10)     | 1.02 (0.94–1.10)     | 1.02 (0.94–1.10)     | 1.02 (0.94–1.10)     | 1.02 (0.94–1.10)     |
| Educational attainment<br>(ref. < 10 years)        |                      |                      |                      |                      |                      |                      |                      |
| 10–12                                              | 1.05 (0.99–1.13)     | 1.06 (1.00–1.14)     | 1.06 (0.99–1.13)     | 1.05 (0.99–1.12)     | 1.06 (0.99–1.13)     | 1.05 (0.99–1.12)     | 1.05 (0.98–1.12)     |
| ≥ 13                                               | 1.01 (0.93–1.10)     | 1.03 (0.94–1.12)     | 1.02 (0.94–1.12)     | 1.01 (0.93–1.10)     | 1.02 (0.93–1.11)     | 1.01 (0.93–1.10)     | 1.01 (0.93–1.10)     |
| Missing                                            | 1.13 (0.96–1.32)     | 1.13 (0.96–1.33)     | 1.13 (0.96–1.33)     | 1.13 (0.96–1.32)     | 1.13 (0.96–1.33)     | 1.13 (0.96–1.32)     | 1.13 (0.96–1.33)     |
| Marital status (ref. married)                      |                      |                      |                      |                      |                      |                      |                      |
| Single                                             | 1.08* (1.01–1.16)    | 1.08* (1.01–1.16)    | 1.08* (1.01–1.15)    | 1.08* (1.01–1.16)    | 1.08* (1.01–1.16)    | 1.08* (1.01–1.16)    | 1.08* (1.01–1.16)    |
| Missing                                            | 1.01 (0.82–1.25)     | 1.01 (0.82–1.25)     | 1.01 (0.82–1.24)     | 1.01 (0.82–1.25)     | 1.01 (0.82–1.25)     | 1.01 (0.82–1.25)     | 1.02 (0.96–1.26)     |
| Self-reported medical conditions<br>(ref. illness) |                      |                      |                      |                      |                      |                      |                      |
| No illness                                         | 0.75* (0.69–0.81)    | 0.75* (0.69–0.81)    | 0.75* (0.69–0.81)    | 0.75* (0.69–0.81)    | 0.75* (0.69–0.81)    | 0.75* (0.69–0.81)    | 0.75* (0.70–0.82)    |
| Missing                                            | 0.98 (0.89–1.08)     | 0.98 (0.89–1.08)     | 0.98 (0.89–1.08)     | 0.98 (0.89–1.08)     | 0.98 (0.89–1.08)     | 0.98 (0.89–1.08)     | 0.98 (0.89–1.08)     |
| Smoking (ref. never smoked)                        |                      |                      |                      |                      |                      |                      |                      |
| Past smoker                                        | 1.03 (0.95–1.13)     | 1.03 (0.95–1.13)     | 1.04 (0.95–1.13)     | 1.03 (0.95–1.13)     | 1.03 (0.94–1.13)     | 1.03 (0.94–1.13)     | 1.03 (0.94–1.12)     |
| Current smoker                                     | 1.29* (1.16–1.44)    | 1.28* (1.15–1.44)    | 1.29* (1.15–1.44)    | 1.29* (1.16–1.44)    | 1.29* (1.15–1.44)    | 1.29* (1.16–1.44)    | 1.29* (1.16–1.45)    |
| Missing                                            | 1.00 (0.90–1.12)     | 1.00 (0.89–1.12)     | 1.00 (0.90–1.12)     | 1.00 (0.89–1.12)     | 1.00 (0.89–1.12)     | 1.00 (0.89–1.12)     | 1.00 (0.90–1.12)     |
| Alcohol consumption<br>(ref. current drinker)      |                      |                      |                      |                      |                      |                      |                      |
| Past drinker                                       | 1.26* (1.08–1.47)    | 1.25* (1.07–1.46)    | 1.25* (1.07–1.45)    | 1.26* (1.08–1.47)    | 1.26* (1.08–1.47)    | 1.26* (1.08–1.47)    | 1.25* (1.07–1.45)    |
| Never drank                                        | 1.11* (1.03–1.20)    | 1.11* (1.03–1.20)    | 1.11* (1.03–1.19)    | 1.12* (1.04–1.21)    | 1.12* (1.04–1.20)    | 1.12* (1.04–1.20)    | 1.11* (1.03–1.20)    |
| Missing                                            | 1.13 (0.94–1.34)     | 1.13 (0.95–1.35)     | 1.12 (0.94–1.34)     | 1.13 (0.94–1.34)     | 1.13 (0.94–1.34)     | 1.13* (0.94–1.34)    | 1.12* (0.94–1.34)    |
| Walking time<br>(ref. <30 min/day)                 |                      |                      |                      |                      |                      |                      |                      |
| 30–60                                              | 0.86* (0.81–0.92)    | 0.86* (0.81–0.92)    | 0.87* (0.81–0.93)    | 0.86* (0.80–0.92)    | 0.86* (0.81–0.92)    | 0.86* (0.81–0.92)    | 0.86* (0.80–0.92)    |
| 60–90                                              | 0.80* (0.73–0.87)    | 0.80* (0.73–0.87)    | 0.80* (0.73–0.88)    | 0.79 (0.72–0.87)     | 0.80* (0.72–0.87)    | 0.79* (0.72–0.87)    | 0.80* (0.73–0.87)    |
| >90                                                | 0.72* (0.65–0.80)    | 0.72* (0.65–0.80)    | 0.73* (0.66–0.81)    | 0.72* (0.65–0.80)    | 0.72* (0.65–0.80)    | 0.72* (0.65–0.80)    | 0.74* (0.67–0.82)    |
| Missing                                            | 0.84* (0.74–0.96)    | 0.84* (0.74–0.96)    | 0.85* (0.74–0.97)    | 0.84* (0.73–0.96)    | 0.84* (0.73–0.96)    | 0.84* (0.73–0.96)    | 0.85* (0.74–0.97)    |

|                                                         |                   |                   |                   |                   |                   |                   |                   |
|---------------------------------------------------------|-------------------|-------------------|-------------------|-------------------|-------------------|-------------------|-------------------|
| Frequency of going outdoors<br>(ref. almost every day)  |                   |                   |                   |                   |                   |                   |                   |
| 2–3 times/week                                          | 1.11* (1.04–1.19) | 1.11* (1.04–1.19) | 1.10* (1.03–1.18) | 1.11* (1.04–1.19) | 1.11* (1.03–1.19) | 1.11* (1.04–1.19) | 1.10* (1.03–1.18) |
| About once/week                                         | 1.11 (1.00–1.23)  | 1.10 (0.99–1.22)  | 1.10 (0.99–1.22)  | 1.11 (1.00–1.23)  | 1.11 (1.00–1.22)  | 1.11 (1.00–1.23)  | 1.11 (1.00–1.23)  |
| Rarely                                                  | 1.35* (1.21–1.51) | 1.34* (1.20–1.50) | 1.34* (1.20–1.50) | 1.35* (1.21–1.51) | 1.35* (1.21–1.51) | 1.35* (1.21–1.51) | 1.35* (1.21–1.51) |
| Missing                                                 | 1.18 (1.00–1.41)  | 1.18 (1.00–1.41)  | 1.18 (0.99–1.40)  | 1.19 (1.00–1.41)  | 1.19 (1.00–1.41)  | 1.19 (1.00–1.41)  | 1.18 (1.00–1.41)  |
| Depression<br>(ref. no depression)                      |                   |                   |                   |                   |                   |                   |                   |
| Depressive tendency                                     | 1.26* (1.17–1.36) | 1.26* (1.16–1.35) | 1.26* (1.17–1.36) | 1.26* (1.17–1.36) | 1.26* (1.17–1.36) | 1.26* (1.17–1.36) | 1.26* (1.17–1.36) |
| Depression                                              | 1.37* (1.22–1.54) | 1.36* (1.21–1.53) | 1.37* (1.22–1.54) | 1.38* (1.23–1.55) | 1.38* (1.23–1.55) | 1.38* (1.23–1.55) | 1.37* (1.22–1.54) |
| Missing                                                 | 1.16* (1.07–1.25) | 1.16* (1.07–1.25) | 1.16* (1.08–1.26) | 1.16* (1.07–1.25) | 1.16* (1.07–1.25) | 1.16* (1.07–1.25) | 1.16* (1.07–1.25) |
| Emotional support<br>(ref. available)                   |                   |                   |                   |                   |                   |                   |                   |
| Not available                                           | 1.13* (1.10–1.29) | 1.13* (1.03–1.24) | 1.13* (1.03–1.25) | 1.13* (1.03–1.24) | 1.13* (1.03–1.24) | 1.13* (1.03–1.24) | 1.14* (1.04–1.25) |
| Missing                                                 | 0.96 (0.94–1.44)  | 0.95 (0.77–1.17)  | 0.96 (0.78–1.19)  | 0.95 (0.77–1.18)  | 0.95 (0.77–1.18)  | 0.94 (0.77–1.17)  | 0.96 (0.77–1.18)  |
| Instrumental support<br>(ref. available)                |                   |                   |                   |                   |                   |                   |                   |
| Not available                                           | 1.19* (1.10–1.29) | 1.19* (1.10–1.29) | 1.19* (1.10–1.29) | 1.19* (1.11–1.29) | 1.19* (1.10–1.29) | 1.19* (1.11–1.29) | 1.20* (1.11–1.29) |
| Missing                                                 | 1.16 (0.94–1.45)  | 1.17 (0.94–1.44)  | 1.17 (0.94–1.45)  | 1.16 (0.94–1.44)  | 1.16 (0.77–1.18)  | 1.16 (0.94–1.43)  | 1.17 (0.95–1.44)  |
| Frequency of meeting friends (ref.<br>almost every day) |                   |                   |                   |                   |                   |                   |                   |
| 2–3 times/week                                          | 1.01 (0.91–1.12)  | 1.01 (0.91–1.13)  | 1.01 (0.91–1.13)  | 1.01 (0.91–1.12)  | 1.01 (0.91–1.12)  | 1.01 (0.91–1.12)  | 1.01 (0.90–1.11)  |
| About once/week                                         | 1.00 (0.89–1.11)  | 1.00 (0.90–1.12)  | 0.99 (0.89–1.11)  | 1.00 (0.89–1.12)  | 0.99 (0.89–1.12)  | 1.00 (0.89–1.12)  | 0.99 (0.89–1.11)  |
| 1–2 times/month                                         | 1.02 (0.91–1.13)  | 1.02 (0.91–1.13)  | 1.00 (0.90–1.12)  | 1.02 (0.92–1.14)  | 1.02 (0.91–1.13)  | 1.02 (0.92–1.14)  | 1.01 (0.91–1.13)  |
| A few times a year or less                              | 1.05 (0.94–1.17)  | 1.03 (0.93–1.15)  | 1.02 (0.92–1.14)  | 1.06 (0.95–1.18)  | 1.05 (0.95–1.17)  | 1.06 (0.95–1.17)  | 1.04 (0.94–1.16)  |
| Missing                                                 | 1.08 (0.93–1.26)  | 1.07 (0.92–1.25)  | 1.09 (0.93–1.26)  | 1.08 (0.93–1.26)  | 1.08 (0.93–1.25)  | 1.08 (0.93–1.25)  | 1.09 (0.94–1.26)  |
| IADL (ref. not decline)                                 |                   |                   |                   |                   |                   |                   |                   |
| Decline                                                 | 1.23* (1.15–1.32) | 1.22* (1.14–1.31) | 1.23* (1.14–1.31) | 1.24* (1.16–1.33) | 1.23* (1.15–1.32) | 1.24* (1.16–1.33) | 1.24* (1.16–1.33) |
| Missing                                                 | 1.20* (1.08–1.34) | 1.20* (1.07–1.33) | 1.20* (1.08–1.34) | 1.21* (1.08–1.34) | 1.20* (1.08–1.34) | 1.20* (1.08–1.34) | 1.21* (1.09–1.34) |

HR: Hazard ratio; CI: confidence interval; ref: reference. \*p &lt; 0.05.

Model 1: Crude model + sex, age, equivalent income, educational attainment, marital status, and self-reported medical conditions. Model 2: Model 1 + smoking, alcohol consumption, walking time (per. day), frequency of going outdoors, depression, emotional support, instrumental support, frequency of meeting friends, and IADL.
